# Supplementary material
Source: PubMed Central journal article supplement (PMC5538427)
Supplement: EMBR-18-0-s001.pdf [file EMBR-18-0-s001.pdf]

## Appendix

### The mutant p53-ID4 complex controls VEGFA isoforms production by recruiting lncRNA MALAT1

#### Table of content

|        |                         |                                                                                                                                            |
|--------|-------------------------|--------------------------------------------------------------------------------------------------------------------------------------------|
| p. 2-4 | Appendix Table S1       | List of mRNAs that resulted bound by ID4 protein by RIP-chip analysis in MDA-MB-468 cells                                                  |
| p.5    | Appendix Table S2       | Functional classification of genes whose transcripts were found to interact with ID4 protein through RIP-chip analysis in MDA-MB-468 cells |
| p.6-7  | Appendix Table S3       | Genes comprised in the 16-VEGFA signature used for GSEA and Kaplan-Meier analyses                                                          |
| p.8    | Appendix Table S4       | Characteristics of patients with basal-like breast cancer considered for GSEA and Kaplan-Meier analyses                                    |
| p.9-11 | Appendix Table S5       | Oligonucleotides used in PCR analyses                                                                                                      |
| p.12   | Appendix Figure S1      |                                                                                                                                            |
| p.13   | Appendix Figure S2      |                                                                                                                                            |
| p.14   | Appendix Figure S3      |                                                                                                                                            |
| p.15   | Appendix Figure Legends |                                                                                                                                            |

**Appendix Table S1. List of mRNAs that resulted bound by ID4 protein by RIP-chip analysis in MDA-MB-468 cells.** Ribonucleoprotein immunoprecipitation (RIP) was performed using 2 antibodies recognizing ID4 protein (H-70 from Santa Cruz and 49261 from Abcam); microarray analysis was performed on Affymetrix platform (Human Gene 1.0 ST arrays). Transcripts that were enriched >2.5-fold with both antibodies are reported.

| Fold1 (H70) | Fold2 (Abcam) | Gene Symbol | To     | Gene Name                                                                                                                          |
|-------------|---------------|-------------|--------|------------------------------------------------------------------------------------------------------------------------------------|
| 2,93        | 2,64          | ACTN4       | 786096 | actinin, alpha 4                                                                                                                   |
| 5,62        | 4,69          | ADIPOR1     | 823710 | adiponectin receptor 1                                                                                                             |
| 2,86        | 2,88          | AKR1B1      | 782528 | aldo-keto reductase family 1, member B1 (aldose reductase)                                                                         |
| 2,74        | 3,37          | ALG8        | 782511 | asparagine-linked glycosylation 8, alpha-1,3-glycosyltransferase homolog (S. cerevisiae)                                           |
| 2,75        | 2,83          | ALG9        | 795413 | asparagine-linked glycosylation 9, alpha-1,2-mannosyltransferase homolog (S. cerevisiae)                                           |
| 2,88        | 2,92          | ANXA2       | 787053 | annexin A2 pseudogene 3; annexin A2; annexin A2 pseudogene 1                                                                       |
| 2,88        | 3,11          | ANXA3       | 812167 | annexin A3                                                                                                                         |
| 3,17        | 3,38          | APP         | 810642 | amyloid beta (A4) precursor protein                                                                                                |
| 3,14        | 5,01          | ATF2        | 796169 | activating transcription factor 2                                                                                                  |
| 2,88        | 3,35          | ATP6V0E1    | 819267 | ATPase, H <sup>+</sup> transporting, lysosomal 9kDa, V0 subunit e1                                                                 |
| 4,11        | 3,42          | AURKA       | 782105 | aurora kinase A; aurora kinase A pseudogene 1                                                                                      |
| 2,88        | 3,11          | BAT1        | 810340 | HLA-B associated transcript 1                                                                                                      |
| 3,74        | 2,58          | BBOX1       | 813438 | butyrobetaine (gamma), 2-oxoglutarate dioxygenase (gamma-butyrobetaine hydroxylase) 1                                              |
| 3,71        | 2,95          | BTF3L4      | 812346 | basic transcription factor 3-like 4; similar to hCG2008008                                                                         |
| 2,78        | 2,86          | CALM3       | 776019 | calmodulin 3 (phosphorylase kinase, delta); calmodulin 2 (phosphorylase kinase, delta); calmodulin 1 (phosphorylase kinase, delta) |
| 4,12        | 2,97          | CAPNS1      | 777192 | calpain, small subunit 1                                                                                                           |
| 4,16        | 4,43          | CASP14      | 826235 | caspase 14, apoptosis-related cysteine peptidase                                                                                   |
| 2,65        | 2,67          | CCDC6       | 799583 | coiled-coil domain containing 6                                                                                                    |
| 2,72        | 2,55          | CCNI        | 825102 | cyclin I                                                                                                                           |
| 3,01        | 2,71          | CD164       | 773106 | CD164 molecule, sialomucin                                                                                                         |
| 3,86        | 3,43          | CD24        | 805559 | CD24 molecule; CD24 molecule-like 4                                                                                                |
| 3,77        | 3,54          | CD81        | 772612 | CD81 molecule                                                                                                                      |
| 2,78        | 2,58          | CD9         | 813468 | CD9 molecule                                                                                                                       |
| 2,54        | 2,65          | CDC123      | 825411 | cell division cycle 123 homolog (S. cerevisiae)                                                                                    |
| 2,95        | 2,75          | CDC37       | 795814 | cell division cycle 37 homolog (S. cerevisiae)                                                                                     |
| 10,20       | 6,64          | CDR1        | 821476 | cerebellar degeneration-related protein 1, 34kDa                                                                                   |
| 4,75        | 2,68          | CHP         | 779833 | calcium binding protein P22                                                                                                        |
| 2,72        | 3,47          | CLINT1      | 790599 | clathrin interactor 1                                                                                                              |
| 2,68        | 3,82          | CNOT7       | 780576 | CCR4-NOT transcription complex, subunit 7                                                                                          |
| 3,55        | 3,20          | COPS6       | 799250 | COP9 constitutive photomorphogenic homolog subunit 6 (Arabidopsis)                                                                 |
| 2,87        | 2,95          | CSNK1D      | 814527 | casein kinase 1, delta                                                                                                             |
| 2,67        | 4,46          | CSNK2A1P    | 799522 | casein kinase 2, alpha 1 polypeptide pseudogene; casein kinase 2, alpha 1 polypeptide                                              |
| 3,60        | 3,24          | CSNK2B      | 818087 | lymphocyte antigen 6 complex, locus G5B; casein kinase 2, beta polypeptide                                                         |
| 2,64        | 3,24          | DAD1        | 775593 | defender against cell death 1                                                                                                      |
| 2,52        | 3,63          | DDX17       | 775919 | DEAD (Asp-Glu-Ala-Asp) box polypeptide 17                                                                                          |
| 4,40        | 3,33          | DHCR24      | 785925 | 24-dehydrocholesterol reductase                                                                                                    |
| 3,06        | 2,63          | DHCR7       | 777080 | 7-dehydrocholesterol reductase                                                                                                     |
| 3,28        | 4,61          | DHFR        | 812353 | dihydrofolate reductase                                                                                                            |
| 3,42        | 4,24          | DNAJC19     | 793565 | similar to translocase of the inner mitochondrial membrane 14; DnaJ (Hsp40) homolog, subfamily C, member 19                        |
| 5,36        | 3,76          | ECH1        | 822387 | enoyl Coenzyme A hydratase 1, peroxisomal                                                                                          |
| 3,06        | 3,41          | EGFR        | 816368 | epidermal growth factor receptor (erythroblastic leukemia viral (v-erb-b) oncogene homolog, avian)                                 |
| 2,98        | 3,19          | EI24        | 806893 | etoposide induced 2.4 mRNA                                                                                                         |
| 2,82        | 2,81          | EIF2S3      | 776090 | eukaryotic translation initiation factor 2, subunit 3 gamma, 52kDa                                                                 |
| 3,21        | 4,27          | EIF4EBP2    | 792823 | eukaryotic translation initiation factor 4E binding protein 2                                                                      |
| 3,02        | 3,35          | EIF5A       | 773179 | eukaryotic translation initiation factor 5A; eukaryotic translation initiation factor 5A-like 1                                    |
| 3,70        | 3,36          | ELOVL1      | 818641 | elongation of very long chain fatty acids (FEN1/Elo2, SUR4/Elo3, yeast)-like 1                                                     |
| 3,27        | 2,78          | EMP2        | 773898 | epithelial membrane protein 2                                                                                                      |
| 6,34        | 3,88          | ENO1        | 783039 | enolase 1, (alpha)                                                                                                                 |
| 2,98        | 2,66          | EPR1        | 797117 | effector cell peptidase receptor 1 (non-protein coding)                                                                            |
| 3,32        | 2,54          | EPS15       | 818063 | epidermal growth factor receptor pathway substrate 15                                                                              |
| 2,63        | 2,66          | FBXO18      | 789822 | F-box protein, helicase, 18                                                                                                        |
| 4,66        | 3,60          | GABARAP     | 815063 | GABA(A) receptor-associated protein                                                                                                |
| 3,20        | 2,61          | GATAD2A     | 793345 | GATA zinc finger domain containing 2A                                                                                              |
| 3,10        | 2,55          | GDI1        | 809511 | GDP dissociation inhibitor 1                                                                                                       |

|      |      |           |        |                                                                                                                                  |
|------|------|-----------|--------|----------------------------------------------------------------------------------------------------------------------------------|
| 2,54 | 2,73 | GDI2      | 787514 | GDP dissociation inhibitor 2                                                                                                     |
| 2,96 | 2,62 | GPSN2     |        | TECR trans-2,3-enoyl-CoA reductase                                                                                               |
| 3,01 | 2,77 | HCCS      | 798837 | holocytochrome c synthase (cytochrome c heme-lyase)                                                                              |
| 2,99 | 3,13 | HDAC1     | 775085 | histone deacetylase 1                                                                                                            |
| 2,85 | 2,50 | HDLBP     | 810749 | high density lipoprotein binding protein                                                                                         |
| 8,42 | 7,16 | HIATL1    | 800934 | hippocampus abundant transcript-like 1                                                                                           |
| 3,52 | 2,51 | HIST1H2BH | 821062 | histone cluster 1, H2bh                                                                                                          |
| 2,62 | 3,08 | HIST1H4L  | 784692 | histone cluster 1, H4l                                                                                                           |
| 2,61 | 2,96 | HIST2H2AB | 820180 | histone cluster 2, H2ab                                                                                                          |
| 6,08 | 4,12 | HIST2H2AC | 814981 | histone cluster 2, H2ac                                                                                                          |
| 2,53 | 2,54 | HNRPF     |        |                                                                                                                                  |
| 4,53 | 4,70 | HRB       |        |                                                                                                                                  |
| 2,51 | 2,89 | HSP90AB1  | 807045 | heat shock protein 90kDa alpha (cytosolic), class B member 1                                                                     |
| 3,04 | 2,99 | ILF2      | 775229 | interleukin enhancer binding factor 2, 45kDa                                                                                     |
| 2,75 | 3,15 | ILF3      | 810501 | interleukin enhancer binding factor 3, 90kDa                                                                                     |
| 4,37 | 3,11 | IPO9      | 826586 | importin 9                                                                                                                       |
| 4,33 | 3,31 | KDEL2     | 795959 | KDEL (Lys-Asp-Glu-Leu) endoplasmic reticulum protein retention receptor 2                                                        |
| 5,86 | 3,00 | KLK5      | 783622 | kallikrein-related peptidase 5                                                                                                   |
| 4,09 | 2,90 | KRT18     | 819470 | keratin 18; keratin 18 pseudogene 26; keratin 18 pseudogene 19                                                                   |
| 2,65 | 2,59 | KRT5      | 808801 | keratin 5                                                                                                                        |
| 3,54 | 2,71 | KRT8      | 796258 | keratin 8 pseudogene 9; similar to keratin 8; keratin 8                                                                          |
| 3,93 | 2,61 | LAMP1     | 773945 | lysosomal-associated membrane protein 1                                                                                          |
| 2,75 | 4,73 | LAPTM4A   | 808988 | lysosomal protein transmembrane 4 alpha                                                                                          |
| 3,24 | 2,61 | LOC729843 |        |                                                                                                                                  |
| 2,81 | 3,57 | LRRC37A4  | 821668 | leucine rich repeat containing 37, member A4 (pseudogene)                                                                        |
| 4,22 | 4,10 | LSM14A    | 792918 | LSM14A, SCD6 homolog A (S. cerevisiae)                                                                                           |
| 4,48 | 2,77 | LY6E      | 803722 | lymphocyte antigen 6 complex, locus E                                                                                            |
| 4,48 | 9,93 | MALAT1    | 807518 | metastasis associated lung adenocarcinoma transcript 1 (non-protein coding)                                                      |
| 2,59 | 4,13 | MAPK9     | 783020 | mitogen-activated protein kinase 9                                                                                               |
| 3,55 | 3,93 | MBOAT5    |        |                                                                                                                                  |
| 3,61 | 2,64 | MCFD2     | 776539 | multiple coagulation factor deficiency 2                                                                                         |
| 3,44 | 2,52 | MCM5      | 807548 | minichromosome maintenance complex component 5                                                                                   |
| 2,78 | 2,75 | MED27     | 800566 | similar to cofactor required for Sp1 transcriptional activation, subunit 8, 34kDa; mediator complex subunit 27; CRSP8 pseudogene |
| 2,86 | 6,07 | METAP1    | 785625 | methionyl aminopeptidase 1                                                                                                       |
| 3,65 | 2,81 | MPDU1     | 803697 | mannose-P-dolichol utilization defect 1                                                                                          |
| 2,78 | 3,10 | MSN       | 799778 | moesin                                                                                                                           |
| 3,94 | 2,99 | MT1F      | 794395 | metallothionein 1F                                                                                                               |
| 2,92 | 3,01 | MTA2      | 809718 | metastasis associated 1 family, member 2                                                                                         |
| 3,11 | 2,56 | NFE2L2    | 813212 | nuclear factor (erythroid-derived 2)-like 2                                                                                      |
| 3,30 | 2,78 | NQO1      | 781597 | NAD(P)H dehydrogenase, quinone 1                                                                                                 |
| 2,68 | 7,80 | NUCKS1    | 799600 | nuclear casein kinase and cyclin-dependent kinase substrate 1                                                                    |
| 2,96 | 4,17 | NUP155    | 784280 | nucleoporin 155kDa                                                                                                               |
| 2,67 | 3,30 | PAICS     | 819408 | phosphoribosylaminoimidazole carboxylase, phosphoribosylaminoimidazole succinocarboxamide synthetase                             |
| 3,98 | 3,23 | PAK1      | 795823 | p21 protein (Cdc42/Rac)-activated kinase 1                                                                                       |
| 2,79 | 4,41 | PICALM    | 804797 | phosphatidylinositol binding clathrin assembly protein                                                                           |
| 3,10 | 2,78 | PLP2      | 813393 | proteolipid protein 2 (colonic epithelium-enriched)                                                                              |
| 3,65 | 2,70 | POLDIP2   | 810304 | polymerase (DNA-directed), delta interacting protein 2                                                                           |
| 3,93 | 3,44 | POLR2J3   | 795460 | polymerase (RNA) II (DNA directed) polypeptide J3; polymerase (RNA) II (DNA directed) polypeptide J2                             |
| 6,93 | 5,16 | POLR2J4   | 795688 | polymerase (RNA) II (DNA directed) polypeptide J4, pseudogene                                                                    |
| 3,15 | 2,50 | POLR3K    | 802491 | polymerase (RNA) III (DNA directed) polypeptide K, 12.3 kDa                                                                      |
| 5,17 | 2,63 | POTE2     |        |                                                                                                                                  |
| 2,59 | 4,24 | PPP1CC    | 778740 | protein phosphatase 1, catalytic subunit, gamma isoform                                                                          |
| 2,76 | 2,60 | PRDX3     | 791180 | peroxiredoxin 3                                                                                                                  |
| 3,23 | 3,01 | PRMT5     | 820833 | protein arginine methyltransferase 5                                                                                             |
| 2,79 | 3,08 | PRPS1     | 816631 | phosphoribosyl pyrophosphate synthetase 1; phosphoribosyl pyrophosphate synthetase 1-like 1                                      |
| 2,52 | 3,08 | PTDSS1    | 792506 | phosphatidylserine synthase 1                                                                                                    |
| 4,37 | 2,52 | PXMP2     | 812524 | hypothetical LOC100129532; peroxisomal membrane protein 2, 22kDa                                                                 |
| 4,75 | 3,52 | RAB1B     | 819977 | RAB1B, member RAS oncogene family                                                                                                |
| 4,77 | 5,22 | RAB31     | 804323 | RAB31, member RAS oncogene family                                                                                                |
| 4,68 | 2,65 | RAB5C     | 775592 | RAB5C, member RAS oncogene family                                                                                                |
| 3,38 | 3,22 | RAB7A     | 796982 | RAB7A, member RAS oncogene family                                                                                                |
| 3,11 | 3,30 | RAD23B    | 815871 | RAD23 homolog B (S. cerevisiae)                                                                                                  |
| 2,93 | 3,16 | RAF1      | 781513 | v-raf-1 murine leukemia viral oncogene homolog 1                                                                                 |
| 3,16 | 3,22 | RAG1AP1   | 774129 | recombination activating gene 1 activating protein 1                                                                             |
| 2,82 | 2,56 | RANBP1    | 810677 | similar to RAN binding protein 1; RAN binding protein 1                                                                          |
| 2,56 | 2,55 | RCE1      | 797957 | RCE1 homolog, prenyl protein peptidase (S. cerevisiae)                                                                           |
| 2,58 | 3,25 | RCN1      | 782629 | reticulocalbin 1, EF-hand calcium binding domain                                                                                 |
| 3,66 | 2,91 | RNF26     | 814167 | ring finger protein 26                                                                                                           |
| 2,81 | 2,87 | RPL18A    | 778688 | ribosomal protein L18a pseudogene 6; ribosomal protein L18a                                                                      |

|      |      |            |        |                                                                                                                                                                                                      |
|------|------|------------|--------|------------------------------------------------------------------------------------------------------------------------------------------------------------------------------------------------------|
| 3,79 | 3,11 | RPL28      | 820040 | ribosomal protein L28                                                                                                                                                                                |
| 3,02 | 3,19 | RPL8       | 801125 | ribosomal protein L8; ribosomal protein L8 pseudogene 2                                                                                                                                              |
| 2,54 | 2,52 | S100A10    | 772988 | S100 calcium binding protein A10                                                                                                                                                                     |
| 2,86 | 2,89 | SAR1A      | 825692 | SAR1 homolog A ( <i>S. cerevisiae</i> )                                                                                                                                                              |
| 3,33 | 3,10 | SCD        | 802025 | stearoyl-CoA desaturase (delta-9-desaturase)                                                                                                                                                         |
| 2,57 | 3,21 | SEC61A1    | 779432 | Sec61 alpha 1 subunit ( <i>S. cerevisiae</i> )                                                                                                                                                       |
| 4,72 | 5,79 | SELT       | 801358 | selenoprotein T; similar to Selenoprotein T                                                                                                                                                          |
| 3,16 | 4,37 | SERINC3    | 801618 | serine incorporator 3                                                                                                                                                                                |
| 3,01 | 2,57 | SLC34A2    | 810578 | solute carrier family 34 (sodium phosphate), member 2                                                                                                                                                |
| 2,77 | 2,61 | SLC35B1    | 799141 | solute carrier family 35, member B1                                                                                                                                                                  |
| 3,15 | 3,53 | SLC44A2    | 784643 | solute carrier family 44, member 2                                                                                                                                                                   |
| 2,68 | 2,70 | SORT1      | 818683 | sortilin 1                                                                                                                                                                                           |
| 3,22 | 2,68 | SOSTDC1    | 826633 | sclerostin domain containing 1                                                                                                                                                                       |
| 4,13 | 2,90 | ST6GALNAC2 | 779265 | ST6 (alpha-N-acetyl-neuraminy1-2,3-beta-galactosyl-1,3)-N-acetylgalactosaminide alpha-2,6-sialyltransferase 2                                                                                        |
| 4,11 | 5,89 | STT3A      | 813322 | STT3, subunit of the oligosaccharyltransferase complex, homolog A ( <i>S. cerevisiae</i> )                                                                                                           |
| 4,06 | 3,22 | SURF4      | 805447 | surfeit 4                                                                                                                                                                                            |
| 3,19 | 2,53 | SYVN1      | 826957 | synovial apoptosis inhibitor 1, synoviolin                                                                                                                                                           |
| 6,57 | 3,26 | TECR       | 800114 | glycoprotein, synaptic 2                                                                                                                                                                             |
| 2,73 | 2,89 | TEGT       |        |                                                                                                                                                                                                      |
| 4,60 | 3,53 | TEX261     | 805716 | testis expressed 261                                                                                                                                                                                 |
| 2,80 | 3,06 | TIMP3      | 775480 | TIMP metalloproteinase inhibitor 3                                                                                                                                                                   |
| 2,66 | 2,52 | TMED2      | 776789 | transmembrane emp24 domain trafficking protein 2                                                                                                                                                     |
| 3,46 | 2,62 | TMED3      | 822010 | transmembrane emp24 protein transport domain containing 3                                                                                                                                            |
| 7,30 | 3,65 | TMEM106C   | 821072 | transmembrane protein 106C                                                                                                                                                                           |
| 3,18 | 2,90 | TMEM97     | 820211 | transmembrane protein 97                                                                                                                                                                             |
| 2,90 | 3,97 | TOB2       | 796992 | transducer of ERBB2, 2                                                                                                                                                                               |
| 2,89 | 3,49 | TOX4       | 812256 | TOX high mobility group box family member 4                                                                                                                                                          |
| 4,25 | 2,70 | TPD52L1    | 786887 | tumor protein D52-like 1                                                                                                                                                                             |
| 4,99 | 3,41 | TUBB       | 800083 | tubulin, beta;                                                                                                                                                                                       |
| 3,19 | 2,54 | TUBB2A     | 801263 | tubulin, beta 2A                                                                                                                                                                                     |
| 3,32 | 4,05 | TUBB2C     | 776899 | tubulin, beta 2C                                                                                                                                                                                     |
| 2,63 | 2,82 | TWSG1      | 818639 | twisted gastrulation homolog 1 ( <i>Drosophila</i> )                                                                                                                                                 |
| 4,22 | 2,56 | UBC        | 790215 | ubiquitin C                                                                                                                                                                                          |
| 2,94 | 2,97 | UBE2MP1    | 819741 | ubiquitin-conjugating enzyme E2M (UBC12 homolog, yeast); ubiquitin-conjugating enzyme E2M pseudogene 1                                                                                               |
| 3,40 | 2,58 | UBL4A      | 823016 | ubiquitin-like 4A                                                                                                                                                                                    |
| 2,72 | 2,62 | USP10      | 818267 | ubiquitin specific peptidase 10                                                                                                                                                                      |
| 2,61 | 2,82 | USP39      | 821075 | ubiquitin specific peptidase 39                                                                                                                                                                      |
| 3,68 | 2,63 | VGLL1      | 781113 | vestigial like 1 ( <i>Drosophila</i> )                                                                                                                                                               |
| 2,51 | 3,05 | WDR77      | 804920 | WD repeat domain 77                                                                                                                                                                                  |
| 2,69 | 3,07 | YWHAE      | 790173 | similar to 14-3-3 protein epsilon (14-3-3E) (Mitochondrial import stimulation factor L subunit) (MSF L); tyrosine 3-monooxygenase/tryptophan 5-monooxygenase activation protein, epsilon polypeptide |
| 5,59 | 6,68 | ZFAND6     | 811925 | zinc finger, AN1-type domain 6                                                                                                                                                                       |
| 2,51 | 3,54 | ZNF852     | 825862 | zinc finger protein 852; zinc finger protein 167                                                                                                                                                     |

**Appendix Table S2. Functional classification of genes whose transcripts were found to interact with ID4 protein through RIP-chip analysis in MDA-MB-468 cells.** Enrichment for specific pathways was evaluated by using the ConsensusPathDB at <http://cpdb.molgen.mpg.de> (geneset analysis > enrichment analysis), setting as cut-off the presence of at least 8 genes for the pathway.

| pathway name                                       | set size | candidates contained | p-value | q-value | pathway source |
|----------------------------------------------------|----------|----------------------|---------|---------|----------------|
| <b>EGFR1</b>                                       | 453      | 17 (3.8%)            | 0,00001 | 0,00014 | NetPath        |
| <b>Membrane Trafficking</b>                        | 157      | 9 (5.7%)             | 0,00005 | 0,00053 | Reactome       |
| <b>Protein processing in endoplasmic reticulum</b> | 169      | 9 (5.4%)             | 0,00008 | 0,00060 | KEGG           |
| <b>Cell Cycle, Mitotic</b>                         | 432      | 14 (3.3%)            | 0,00020 | 0,00092 | Reactome       |
| <b>Vesicle-mediated transport</b>                  | 195      | 9 (4.6%)             | 0,00024 | 0,00093 | Reactome       |
| <b>Chromatin modifying enzymes</b>                 | 253      | 10 (4.0%)            | 0,00038 | 0,00110 | Reactome       |
| <b>Chromatin organization</b>                      | 253      | 10 (4.0%)            | 0,00038 | 0,00110 | Reactome       |
| <b>Cell Cycle</b>                                  | 502      | 14 (2.8%)            | 0,00091 | 0,00210 | Reactome       |
| <b>TNFalpha</b>                                    | 234      | 9 (3.8%)             | 0,00091 | 0,00210 | NetPath        |
| <b>TCR</b>                                         | 244      | 9 (3.7%)             | 0,00119 | 0,00249 | NetPath        |
| <b>Disease</b>                                     | 483      | 13 (2.7%)            | 0,00194 | 0,00371 | Reactome       |
| <b>Metabolism of proteins</b>                      | 687      | 16 (2.3%)            | 0,00262 | 0,00464 | Reactome       |
| <b>Cellular responses to stress</b>                | 367      | 10 (2.7%)            | 0,00579 | 0,00951 | Reactome       |

**Appendix Table S3. Genes comprised in the 16-VEGFA signature used for GSEA and Kaplan-Meier analyses.**

| <b>Gene Symbol</b> | <b>Gene Name</b>                                                             | <b>References</b>                                           |
|--------------------|------------------------------------------------------------------------------|-------------------------------------------------------------|
| <i>PTGS2</i>       | Prostaglandin-Endoperoxide Synthase 2                                        | Abe et al., 2001                                            |
| <i>RCAN1</i>       | Regulator Of Calcineurin 1                                                   | Abe et al., 2001; Iizuka et al., 2004; Suehiro et al., 2010 |
| <i>ESM1</i>        | Endothelial Cell-Specific Molecule 1                                         | Rennel et al., 2007                                         |
| <i>CD55</i>        | CD55 Molecule, Decay Accelerating Factor For Complement (Cromer Blood Group) | Mason et al., 2001                                          |
| <i>EGR3</i>        | Early Growth Response 3                                                      | Liu et al., 2003; Suehiro et al., 2010                      |
| <i>EGR2</i>        | Early Growth Response 2                                                      | Liu et al., 2003                                            |
| <i>EGR1</i>        | Early Growth Response 1                                                      | Suehiro et al., 2010                                        |
| <i>ETS1</i>        | V-Ets Avian Erythroblastosis Virus E26 Oncogene Homolog 1                    | Sato et al., 2000; Suehiro et al., 2010                     |
| <i>MMP1</i>        | Matrix Metalloproteinase 1                                                   | Sato et al., 2000                                           |
| <i>FLT1</i>        | Fms-Related Tyrosine Kinase 1                                                | Sato et al., 2000                                           |
| <i>SNAIL</i>       | Snail Family Zinc Finger 1                                                   | Wanami et al., 2008                                         |
| <i>NR4A1</i>       | Nuclear Receptor Subfamily 4, Group A, Member 1                              | Liu et al., 2003                                            |
| <i>NR4A2</i>       | Nuclear Receptor Subfamily 4, Group A, Member 2                              | Liu et al., 2003                                            |
| <i>NR4A3</i>       | Nuclear Receptor Subfamily 4, Group A, Member 3                              | Liu et al., 2003                                            |
| <i>F3</i>          | Coagulation Factor III (Thromboplastin, Tissue Factor)                       | Liu et al., 2003; Suehiro et al., 2010                      |
| <i>TNFSF11</i>     | Tumor Necrosis Factor (Ligand) Superfamily, Member 11                        | Guan et al., 2009                                           |

- Abe M, Sato Y. cDNA microarray analysis of the gene expression profile of VEGF-activated human umbilical vein endothelial cells. *Angiogenesis*. 2001;4(4):289-98.

- Guan H et al. VEGF165 promotes the osteolytic bone destruction of ewing's sarcoma tumors by upregulating RANKL. *Oncol Res.* 2009;18(2-3):117-25.
- Iizuka M et al. Down syndrome candidate region 1, a downstream target of VEGF, participates in endothelial cell migration and angiogenesis. *J Vasc Res.* 2004 Jul-Aug;41(4):334-44.
- Liu D et al. Vascular endothelial growth factor-regulated gene expression in endothelial cells: KDR-mediated induction of Egr3 and the related nuclear receptors Nur77, Nurr1, and Nor1. *Arterioscler Thromb Vasc Biol.* 2003 Nov 1;23(11):2002-7.
- Mason JC et al. Induction of endothelial cell decay-accelerating factor by vascular endothelial growth factor: a mechanism for cytoprotection against complement-mediated injury during inflammatory angiogenesis. *Arthritis Rheum.* 2001 Jan;44(1):138-50.
- Rennel E et al. Endocan is a VEGF-A and PI3K regulated gene with increased expression in human renal cancer. *Exp Cell Res.* 2007 Apr 15;313(7):1285-94.
- Sato Y et al. Properties of two VEGF receptors, Flt-1 and KDR, in signal transduction. *Ann N Y Acad Sci.* 2000 May;902:201-5.
- Suehiro J et al. Vascular endothelial growth factor activation of endothelial cells is mediated by early growth response-3. *Blood.* 2010 Mar 25;115(12):2520-32.
- Wanami LS et al. Vascular endothelial growth factor-A stimulates Snail expression in breast tumor cells: implications for tumor progression. *Exp Cell Res.* 2008 Aug 1;314(13):2448-53.

**Appendix Table S4. Characteristics of patients with basal-like breast cancer considered for GSEA and Kaplan-Meier analyses.**

| Age_class  |                       | T        |                       | Stage        |                       | Grade    |                       | TP53 status |                       | Metastasis event |                       | Death event |                       |
|------------|-----------------------|----------|-----------------------|--------------|-----------------------|----------|-----------------------|-------------|-----------------------|------------------|-----------------------|-------------|-----------------------|
| <i>Age</i> | <i>n</i> <sup>o</sup> | <i>T</i> | <i>n</i> <sup>o</sup> | <i>Stage</i> | <i>n</i> <sup>o</sup> | <i>G</i> | <i>n</i> <sup>o</sup> | <i>TP53</i> | <i>n</i> <sup>o</sup> | <i>M</i>         | <i>n</i> <sup>o</sup> |             | <i>n</i> <sup>o</sup> |
| <40        | 40                    | 1        | 46                    | 1            | 6                     | 1        | 4                     | MUT         | 34                    | 0                | 138                   | 0           | 150                   |
| >60        | 21                    | 2        | 81                    | 2            | 23                    | 2        | 20                    | WT          | 14                    | 1                | 48                    | 1           | 51                    |
| 40-60      | 84                    | 3        | 2                     | 3            | 1                     | 3        | 126                   | NA          | 153                   | NA               | 15                    |             |                       |
| NA         | 56                    | 4        | 5                     | 4            | 1                     | NA       | 51                    |             |                       |                  |                       |             |                       |
|            |                       | NA       | 67                    | NA           | 170                   | 1        | 4                     |             |                       |                  |                       |             |                       |

T: Tumor size; NA: not assessed.



Appendix table S5

| Oligonucleotides used in PCR analyses    |                         |                                     |
|------------------------------------------|-------------------------|-------------------------------------|
| RT                                       | RPL-19 For              | CGGAAGGGCAGGCACAT                   |
|                                          | RPL-19 Rev              | GGCGCAAATCCTCATTCTC                 |
| RT                                       | GAPDH For               | GAGTCAACGGATTTGGTCGT                |
|                                          | GAPDH Rev               | GACAAGCTTCCCGTTCTCAG                |
| RT                                       | 18S rRNA                | TaqMan assay from Life Technologies |
| VEGFA pre-mRNA<br>RT and Int7/Ex8 ChIP   | VEGFA_Int7-Ex8 For      | CTCCTCACTTGGCCCTAACC                |
|                                          | VEGFA_Int7-Ex8 Rev      | TCAGTCTTTCCTGGTGAGAGAT              |
| VEGFA ChIP Int7                          | VEGFA_Int7 For          | ACTGAAAACCCTCCTCAGCA                |
|                                          | VEGFA_Int7 Rev          | AAGAGCTGATGGGTGACCAG                |
| total VEGFA RT                           | VEGF-A all isoforms F   | CTTCTACAGCACAACAATGTG               |
|                                          | VEGF-A all isoforms R   | GTCTTGCTCTATCTTTCTTTGG              |
| VEGFA <sub>121</sub><br>TaqMan assay RT  | VEGFA_Ex3 For           | CCCACTGAGGAGTCCAACAT                |
|                                          | VEGFA_Ex5-8 Rev         | CCTCGGCTTGTCACATTTTTCTTGTC          |
|                                          | VEGFA_Ex4 probe FAM     | AAGGCCAGCACATAGGAGAGAT              |
| VEGFA <sub>121b</sub><br>TaqMan assay RT | VEGFA_Ex3 For           | CCCACTGAGGAGTCCAACAT                |
|                                          | VEGFA_Ex5-8B_Rev        | CTTCTGCTGAGAGATTTTTCTTGT<br>C       |
|                                          | VEGFA_Ex4 probe FAM     | AAGGCCAGCACATAGGAGAGAT              |
| VEGFA <sub>165</sub><br>TaqMan assay RT  | VEGFA_Ex7 For           | CGCAGACGTGTAATGTTCTT                |
|                                          | VEGFA_Ex8 Rev           | GCCTCGGCTTGTCACATC                  |
|                                          | VEGFA_Ex7 probe FAM     | CAAGGCGAGGCAGCTTGAGTTAAA            |
| VEGFA <sub>165b</sub><br>TaqMan assay RT | VEGFA_Ex7 For           | CGCAGACGTGTAATGTTCTT                |
|                                          | VEGFA_Ex7-8B_Rev        | CCTGGTGAGAGATCTGCAAGTAC             |
|                                          | VEGFA_Ex7 probe FAM     | CAAGGCGAGGCAGCTTGAGTTAAA            |
| RT ALDOA isoforms                        | ALDOA-Ex2F              | ACCCAGCACCAGACAGAGTT                |
|                                          | ALDOA-Ex1-Ex3F          | TCTCCTGTGCCAGGAAGTTG                |
|                                          | ALDOA-Ex3R              | GGGTCAGTGCTGGATATTGG                |
| RT                                       | ID4 TaqMan assay        | Hs.PT.49a.3494489.g (IDT)           |
|                                          | ID4 For                 | GTGCGATATGAACGACTGCT                |
|                                          | ID4 Rev                 | CAGGATCTCCACTTTGCTGA                |
|                                          | U2 snRNA For            | CTCGGCCTTTTGGCTAAGAT                |
|                                          | U2 snRNA Rev            | TATTCCATCTCCCTGCTCCA                |
|                                          | NEAT1 For               | TCGGGTATGCTGTTGTGAAA                |
|                                          | NEAT1 Rev               | TGACGTAACAGAATTAGTTCTTACC<br>A      |
|                                          | MALAT1 For              | GGGAAGGCGAAGAAAAGAAT                |
|                                          | MALAT1 Rev              | TGCCCTTAGCTTTTTGTTTCC               |
|                                          | MALAT1_bis For          | GAGGTCTTTGGTGGGTGAA                 |
|                                          | MALAT1_bis Rev          | CCCACCCAGCATTACAGTTC                |
|                                          | MALAT1 For (365-544)    | AAGCAGACCCAGAGCAGTGT                |
|                                          | MALAT1 Rev              | TTTTCAGCTTCCAGGCTCTC                |
|                                          | MALAT1 For (nt 664-832) | GTGGGATTGAGGCGTTTTCC                |

|                                                |                           |                                         |
|------------------------------------------------|---------------------------|-----------------------------------------|
|                                                | MALAT1 Rev (nt 664-832)   | TGGCAAATGGCGGACTTTC                     |
|                                                | MALAT1 For (nt 1332-1515) | GCTTGAGGAAACCGCAGATA                    |
|                                                | MALAT1 Rev (nt 1332-1515) | TTTCCTTCCTCATGCTACTCTTC                 |
|                                                | MALAT1 For (nt 1922-2061) | GGGAAGGCGAAGAAAAGAAT                    |
|                                                | MALAT1 Rev (nt 1922-2061) | TGCCCTTAGCTTTTTGTTTCC                   |
|                                                | MALAT1 For (nt 2629-2698) | TGACCCAGGTGCTACACAGA                    |
|                                                | MALAT1 Rev (nt 2629-2698) | TTCCTGGAATCCTGTCTGCT                    |
|                                                | MALAT1 For (nt 3082-3223) | TGGGGGAGTTTCGTAAGTCTG                   |
|                                                | MALAT1 Rev (nt 3082-3223) | TCTCCAGGACTTGGCAGTCT                    |
|                                                | MALAT1 For (nt 3592-3645) | GGATAATCAGACCACCACAGG                   |
|                                                | MALAT1 Rev (nt 3592-3645) | AGACCTCAACGTGAGAACTGC                   |
|                                                | MALAT1 For (nt 3892-4123) | GAACACCTTCAGGGACTGGA                    |
|                                                | MALAT1 Rev (nt 3892-4123) | GTAACAGGCCACTGCCAACT                    |
|                                                | MALAT1 For (nt 4494-4585) | GGTAGTGTGTGGTTCTCTTTTGG                 |
|                                                | MALAT1 Rev (nt 4494-4585) | AAGCCACTTCCTTTGCTCTG                    |
|                                                | MALAT1 For (nt 4943-5192) | AACAGCTCCTTGGTGAATTGAT                  |
|                                                | MALAT1 Rev (nt 4943-5192) | TGGACATTGCCTCTTCATTG                    |
|                                                | MALAT1 For (nt 5919-6023) | GTTCAAGTGTGGGGCAATCT                    |
|                                                | MALAT1 Rev (nt 5919-6023) | GTTCTTCCGCTCAAATCCTG                    |
|                                                | MALAT1 For (nt 6866-7030) | GGAGGGGACTGAAGCCTTT                     |
|                                                | MALAT1 Rev (nt 6866-7030) | GGGAGAGAGAAACCCACACA                    |
|                                                | MALAT1 For (nt 7431-7500) | CTCACTAAAGGCACCGAAGG                    |
|                                                | MALAT1 Rev (nt 7431-7500) | TGTTGTCTCTCCTGCCACAG                    |
|                                                | MALAT1 For (nt 7916-8076) | GAGGTCTTTGGTGGGTTGAA                    |
|                                                | MALAT1 Rev (nt 7916-8076) | CCCACCCAGCATTACAGTTC                    |
|                                                | BCL2L1 For (Exon 2)       | GTAAACTGGGGTCGCATTGT                    |
|                                                | BCL2L1 Rev (Intron 2)     | CACAAGGGGCTTGTTCTTA                     |
|                                                | BIM For (Exon 2)          | CAACACAAACCCCAAGTCCT                    |
|                                                | BIM Rev (Intron 2)        | CAGATTCAACCATCCACACG                    |
| <b>Oligonucleotides used in ChIRP analysis</b> |                           |                                         |
| MALAT1<br>ChIRP                                | Bio_MALAT1_1              | GCTTCTGCGTTGCTAAAATG/3BioTEG/           |
|                                                | Bio_MALAT1_2              | GCGAGGCGTATTTATAGACG/3BioTEG/           |
|                                                | Bio_MALAT1_3              | ACGCTAAGCAATATCTTAGT/3BioTEG/           |
|                                                | Bio_MALAT1_4              | TAAGCTGTTTAAGTCACCTT/3BioTEG/           |
|                                                | Bio_MALAT1_5              | GGTCTTTTAATCACCTTCGG/3BioTEG/           |
|                                                | Bio_MALAT1_6              | TCTTTCCATTTTCGTCTGCG/3BioTEG/           |
|                                                | Bio_MALAT1_7              | GCCCTTAGCTTTTTGTTTCC/3BioTEG/           |
|                                                | Bio_MALAT1_8              | TCTGGTCTACGTAAACACCC/3BioTEG/           |
|                                                | Bio_MALAT1_9              | CTGGGTACAGCTGTCAATTAA/3BioTEG/          |
|                                                | Bio_MALAT1_10             | TTGCTCCTCAGTCCTAGCTT/3BioTEG/           |
|                                                | Bio_MALAT1_11             | TGGAATCCTTTTTCTAGCT/3BioTEG/            |
| CTR<br>ChIRP                                   | Bio_CTR_1                 | GTAGTGGAGGAGAAACGGTGTGAGTAGTAC/3BioTEG/ |
|                                                | Bio_CTR_2                 | GTAGTGGAGGAGGCGGGTGTGAGTAGTAC/3BioTEG/  |
| <b>siRNA oligonucleotides</b>                  |                           |                                         |
|                                                | SCR                       | CTATAACGGCGCTCGATAT                     |
|                                                | ID4                       | Ambion                                  |

|  |             |                                                                                  |
|--|-------------|----------------------------------------------------------------------------------|
|  | ID4_1       | GATCCTGCAGCACGTTATC                                                              |
|  | ID4_2       | TTACAGAGCTCTTGATATC                                                              |
|  | p53         | Ambion                                                                           |
|  | p53_1       | GACUCCAGUGGUAUUCUAC (CDS)                                                        |
|  | p53_2       | GGUGAACCUUAGUACCUAA (3'-UTR)                                                     |
|  | SRSF1       | NM_006924 duplex 3 (IDT)                                                         |
|  | SRSF1_1     | GAAAGAAGATATGACCTAT (from Ezponda et al., 2010)                                  |
|  | SRSF1_2     | TGAAGCAGGTGATGTATGT (from Ezponda et al., 2010)                                  |
|  | SRSF1_3     | NM_006924 duplex 1 (IDT)                                                         |
|  | si SCR-2    | mC*mU*mA*mU*mA*A*C*G*G*C*G*C*T*C*G*mA*mU*mG*mA*mU                                |
|  | si MALAT1-2 | mG*mG*mG*mA*mG*T*T*A*C*T*T*G*C*C*A*mA*mC*mU*mU*mG (from Tripathi, Mol Cell 2010) |
|  | si-MALAT1_1 | GATCCATAATCGGTTTCAA (from Miyagawa et al., 2012)                                 |
|  | si-MALAT1   | CACAGGGAAAGCGAGTGGTTGGTAA (from Miyagawa et al., 2012)                           |
|  | si-hnRNP A1 | Trifecta 29-mer oligo from Origene                                               |
|  | NC1         | Trifecta negative ctr from Origene                                               |

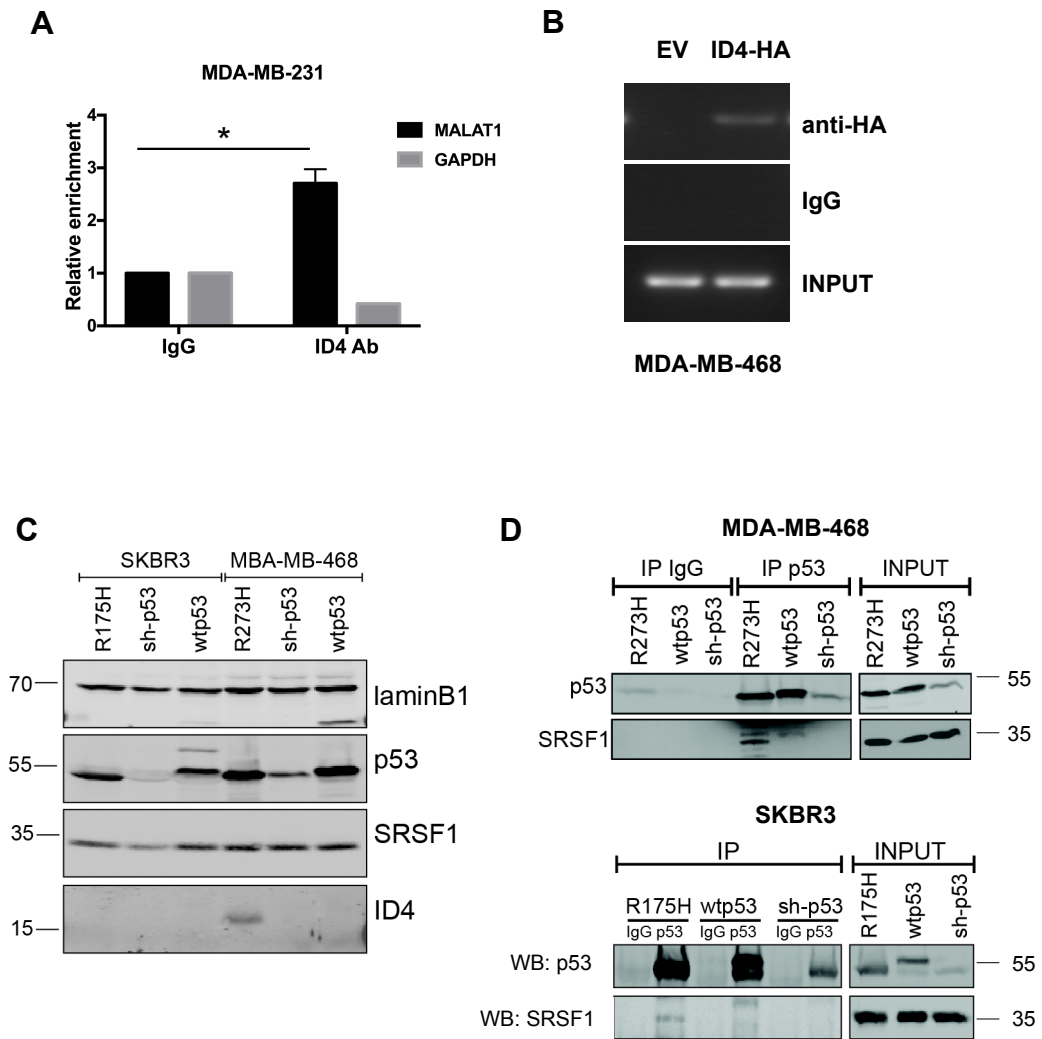

A

Putative interaction regions between VEGFA pre-mRNA and MALAT1 IncRNA

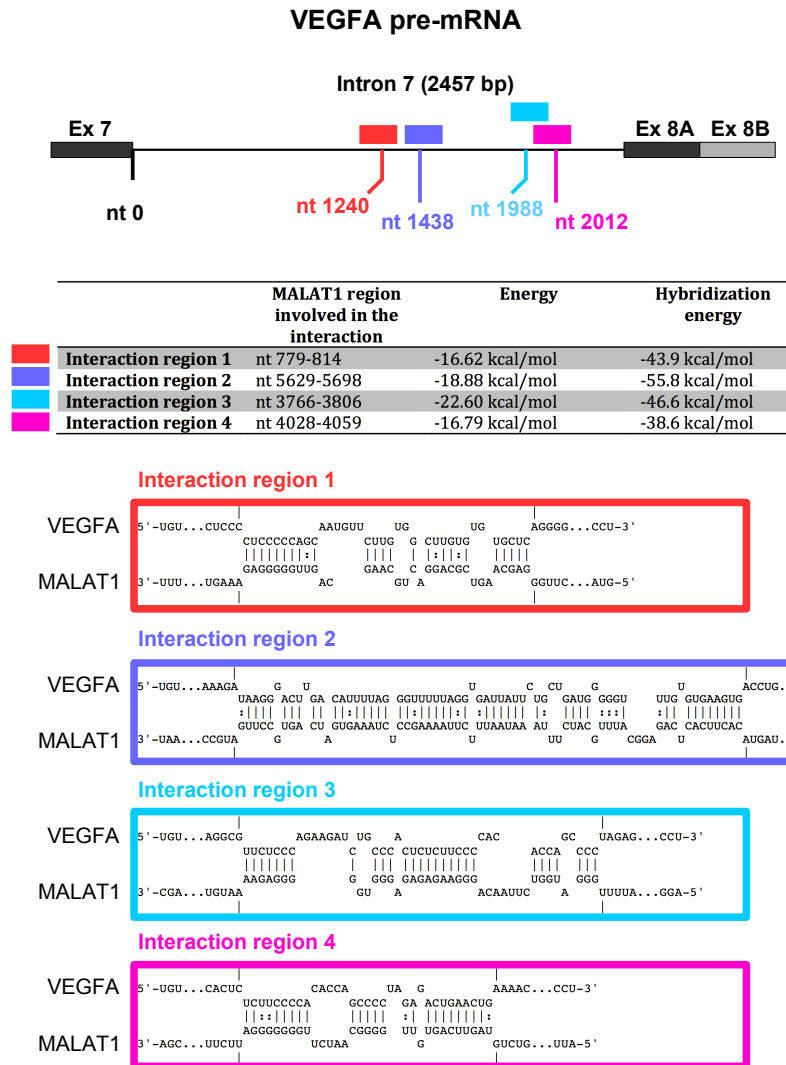

**B** si-SCR si-ID4 si-p53 INPUT

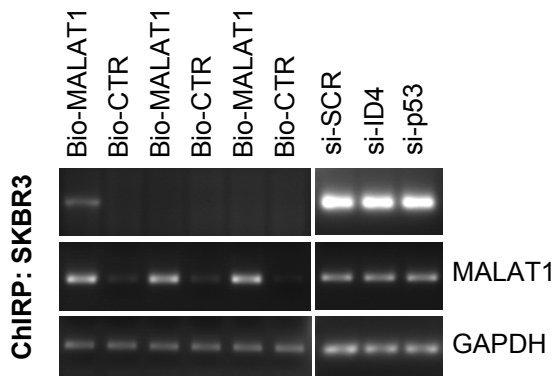

**C**

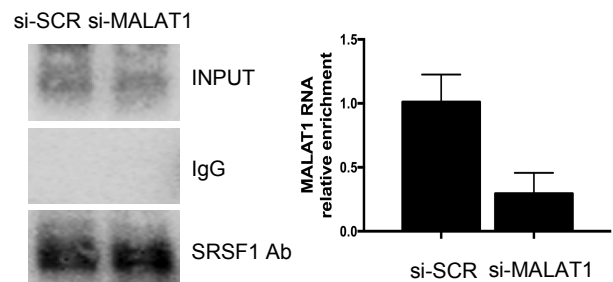

**A**

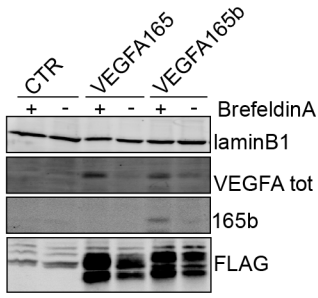

**B**

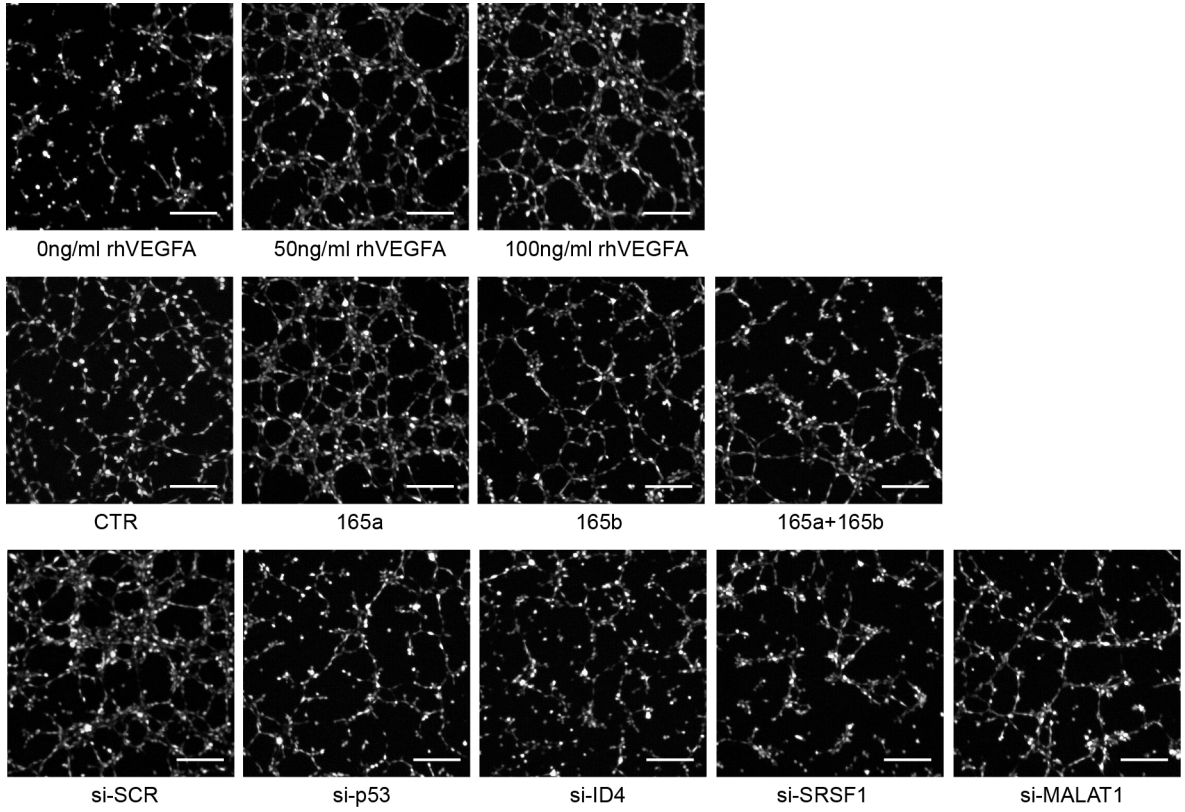

**C**

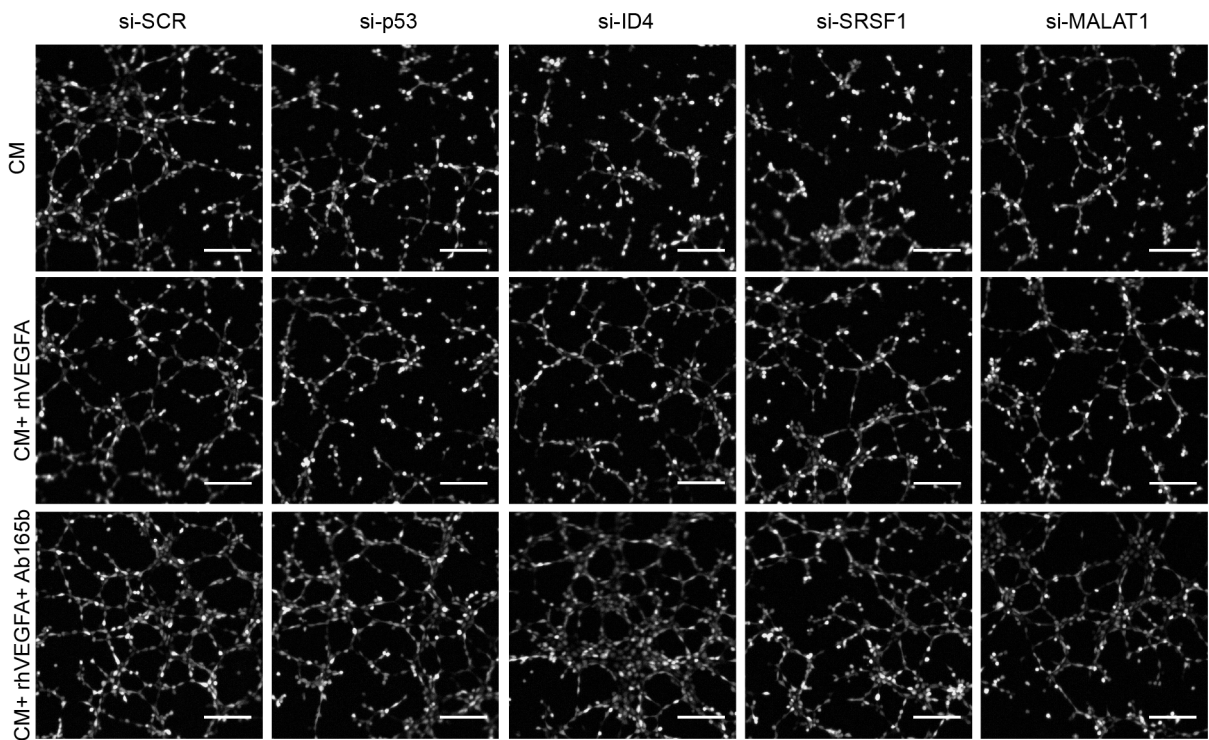

## APPENDIX FIGURE LEGENDS

**Appendix Figure S1.** **A.** RIP (Ribonucleoprotein ImmunoPrecipitation) assay performed in MDA-MB-231 breast cancer cells using an antibody directed to ID4 or IgG as negative control. **B.** RIP assay performed in MDA-MB-468 breast cancer cells transfected with an empty vector (EV) or an ID4-HA expression vector (ID4-HA) using an antibody directed to HA tag (Santa Cruz) or IgG as negative control. MALAT1 RNA abundance was evaluated by RT-PCR. **C.** Characterization of stable cell lines carrying depletion of endogenous mutant p53 expression (sh-p53) or concomitant depletion of endogenous mutant p53 and replacement by flag-tagged wild-type p53 (FLAG wtp53), compared to parental cells SKBR3 (ATCC p53R175H) and MDA-MB-468 (ATCC p53R273H). **D.** SRSF1-p53 interaction evaluated by immunoprecipitation of p53 (and IgG as control) followed by western blot of SRSF1 using lysates from parental MDA-MB-468 cells (upper panel, indicated as R273H) or SKBR3 cells (lower panel, indicated as R175H) as well as in cells stably depleted of endogenous mutant p53 expression (sh-p53) or carrying wild-type p53 replacing endogenous mutant p53 (wtp53).

**Appendix Figure S2.** **A.** Putative interaction between MALAT1 lncRNA and VEGFA pre-mRNA was evaluated using the IntaRNA software (<http://rna.informatik.uni-freiburg.de/IntaRNA/Input.jsp>). **B.** ChIRP assay was performed to recover MALAT1 RNA and its associated RNAs by using a set of biotinylated oligonucleotides complementary to MALAT1 RNA sequence (Bio-MALAT1), or a set of control oligonucleotides (Bio-CTR), in lysates from control (si-SCR), ID4-depleted (si-ID4) and mutant p53-depleted (si-p53) SKBR3 cells. Enrichment for the indicated transcripts was evaluated by RT-PCR. **C.** Western blot analysis of SRSF1 protein immunoprecipitated in the RIP assay described in Figure 6E-F was performed to ensure efficient recovery of SRSF1 protein following depletion of MALAT1 in MDA-MB-468 cells. Efficiency of MALAT1 depletion after transfection of specific siRNAs is shown in right graph.

**Appendix Figure S3. A.** Western blot analysis of SKBR3 cells transfected with flag-tagged expression vectors for VEGF<sub>165</sub> or VEGF<sub>165b</sub>. Antibodies recognizing total VEGF, VEGF<sub>165b</sub> (165b) or FLAG tag were used. **B-C.** Representative images of the tube-formation assays reported in Figure 7. 0 ng/mL as well as 50-100 ng/mL of recombinant VEGFA (rhVEGFA) were used, respectively, as negative and positive controls for the assays. Experimental conditions are labeled as in Figure 7.
