# Supplementary material
Source: PubMed Central journal article supplement (PMC5538427)

Figure 1B

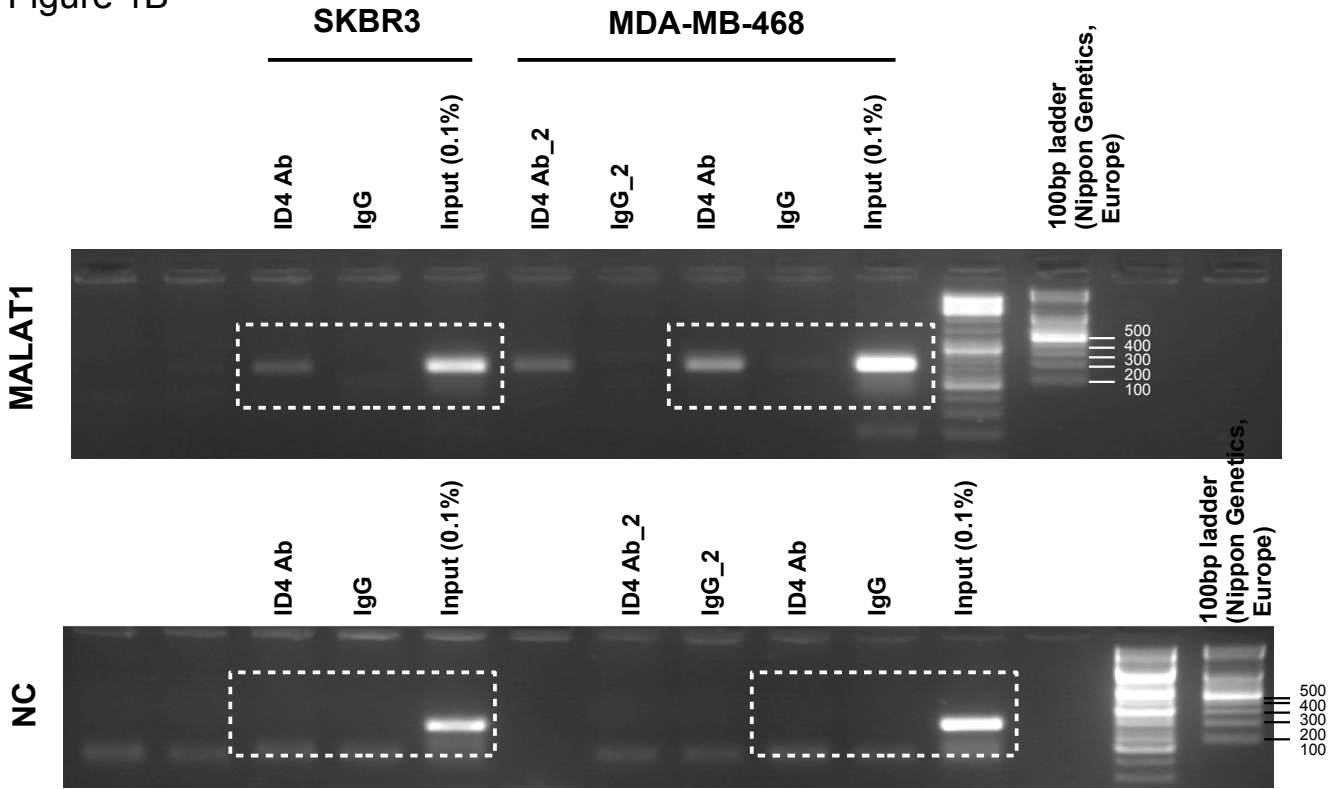

Figure 1G

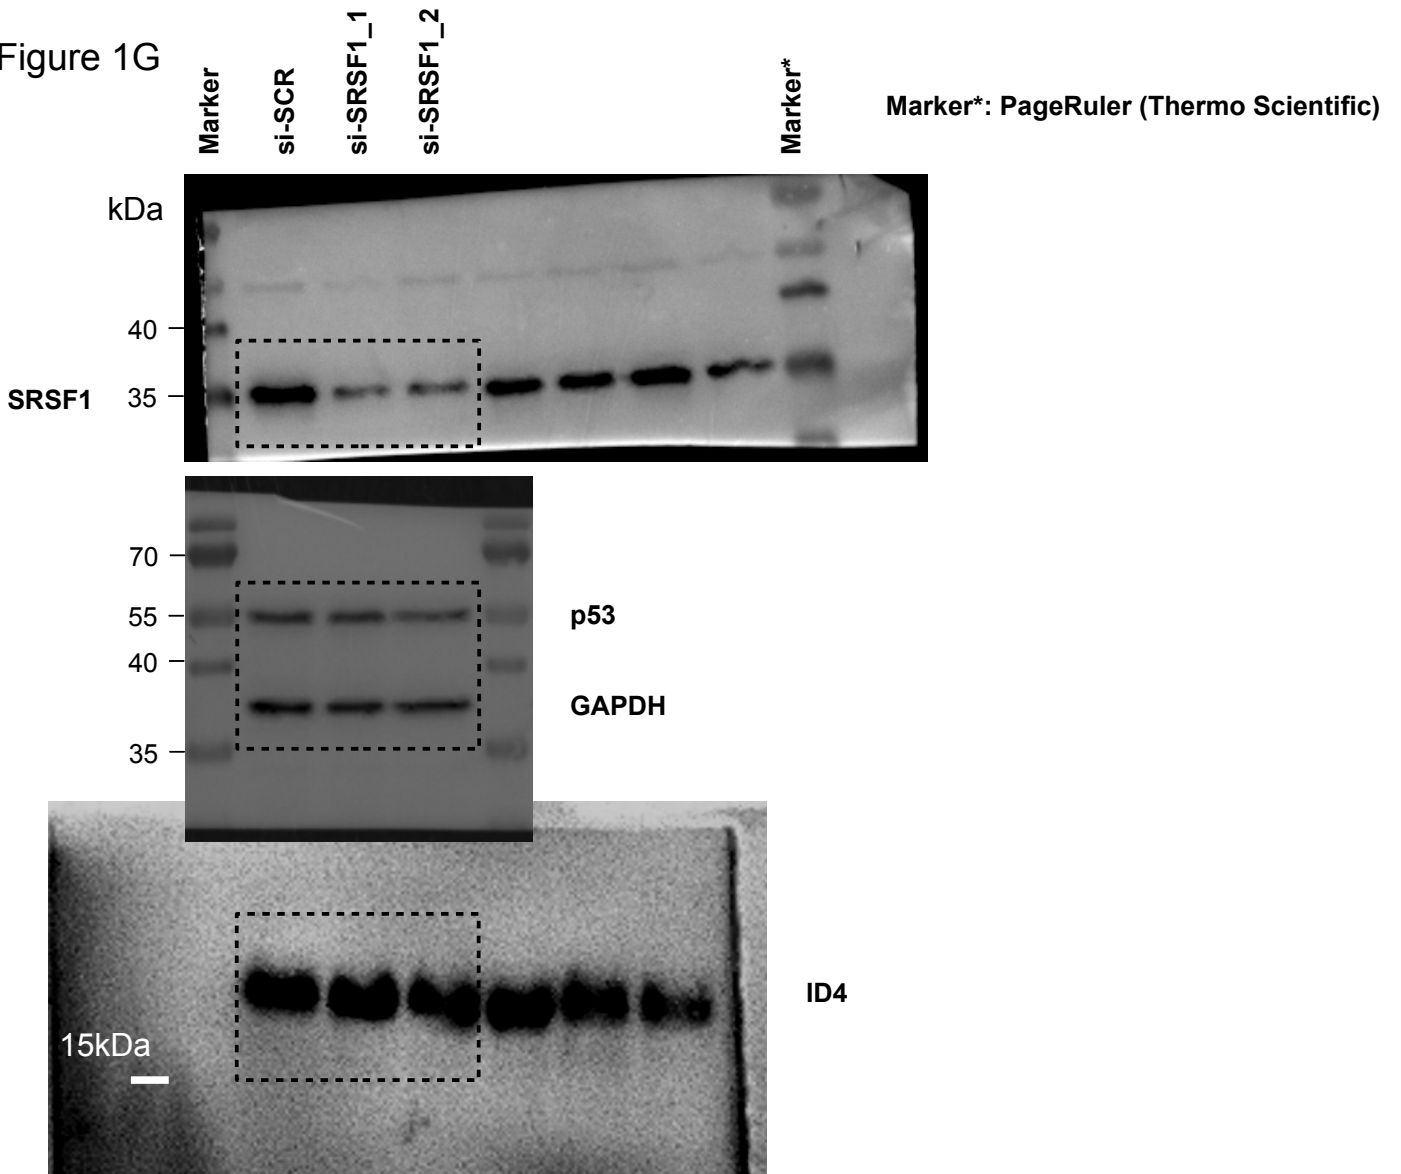

Supplement: EMBR-18-0-s003.pdf [file EMBR-18-0-s003.pdf]
