# Supplementary material
Source: PubMed Central journal article supplement (PMC5538427)

Figure 3A

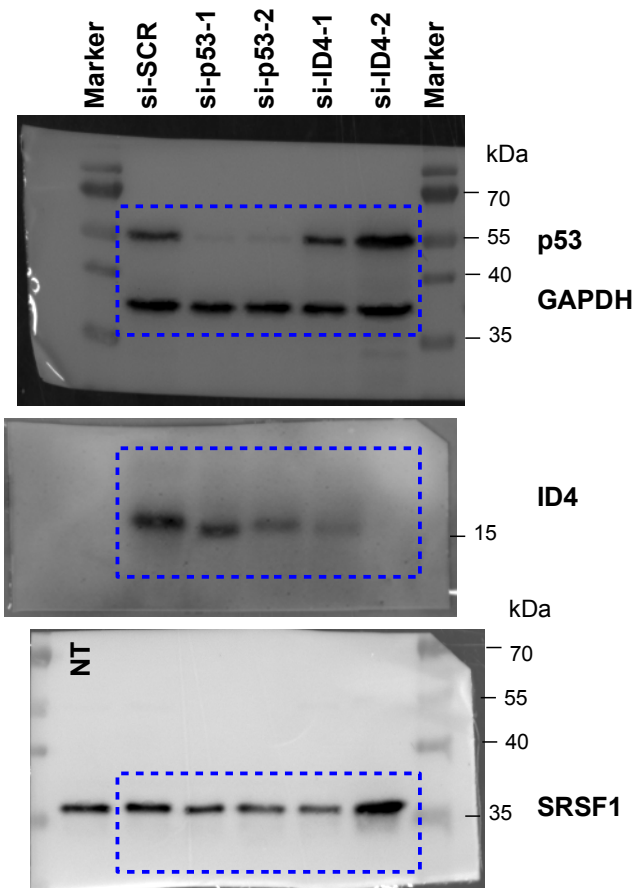

NT: not transfected

Figure 3D

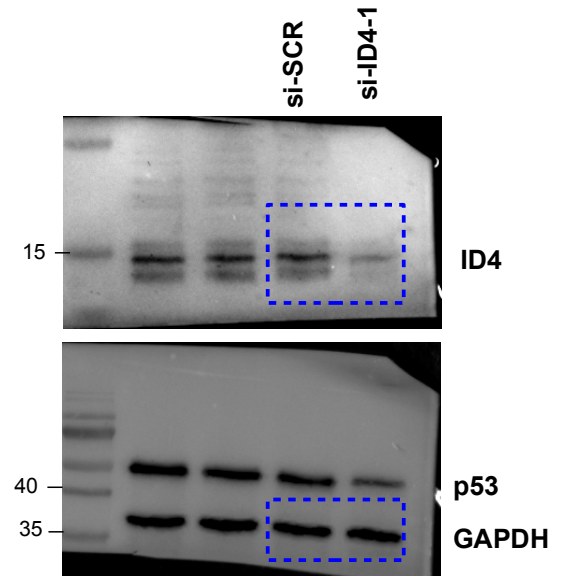

Figure 3F

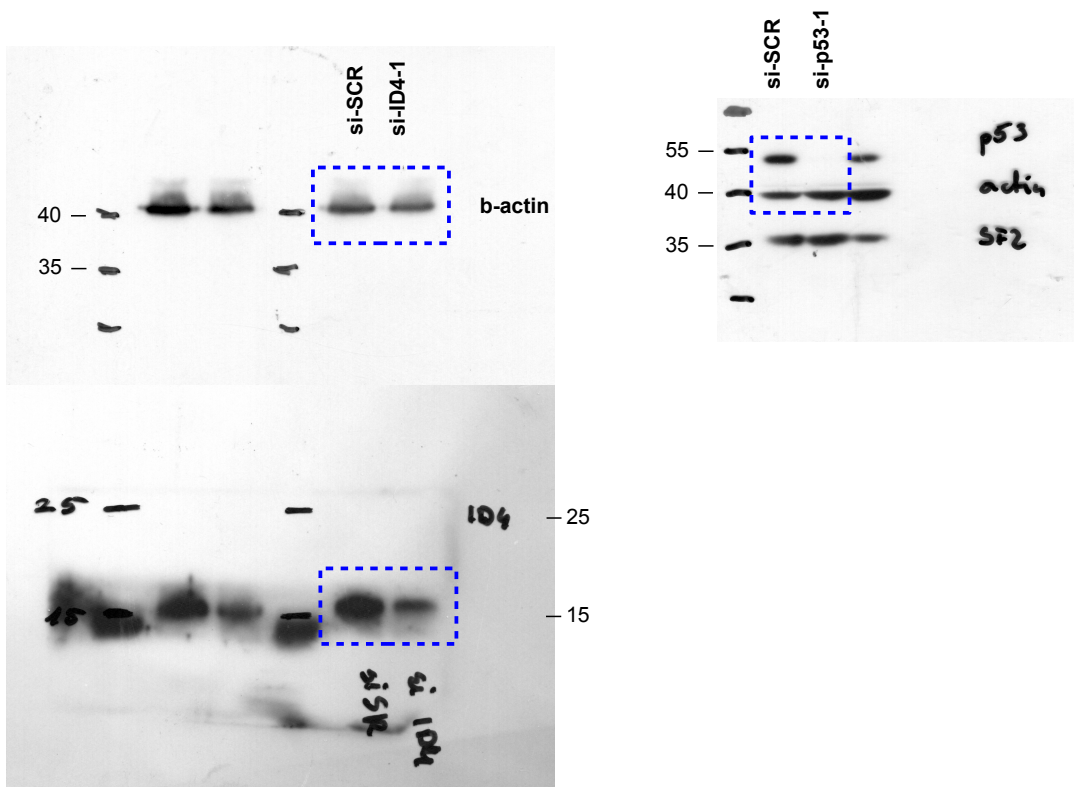

Supplement: EMBR-18-0-s005.pdf [file EMBR-18-0-s005.pdf]
