# Supplementary material
Source: PubMed Central journal article supplement (PMC5538427)

Figure 5D

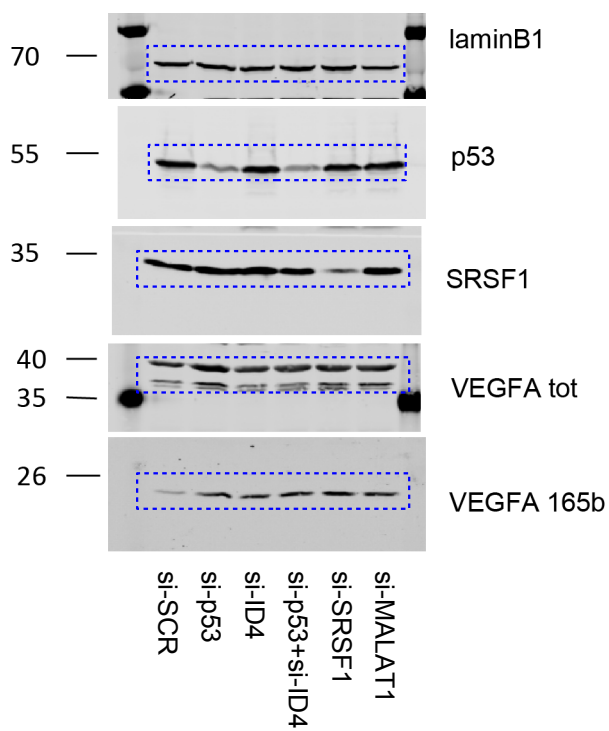

Supplement: EMBR-18-0-s007.pdf [file EMBR-18-0-s007.pdf]
