# Supplementary material
Source: PubMed Central journal article supplement (PMC5538427)

Figure 6D

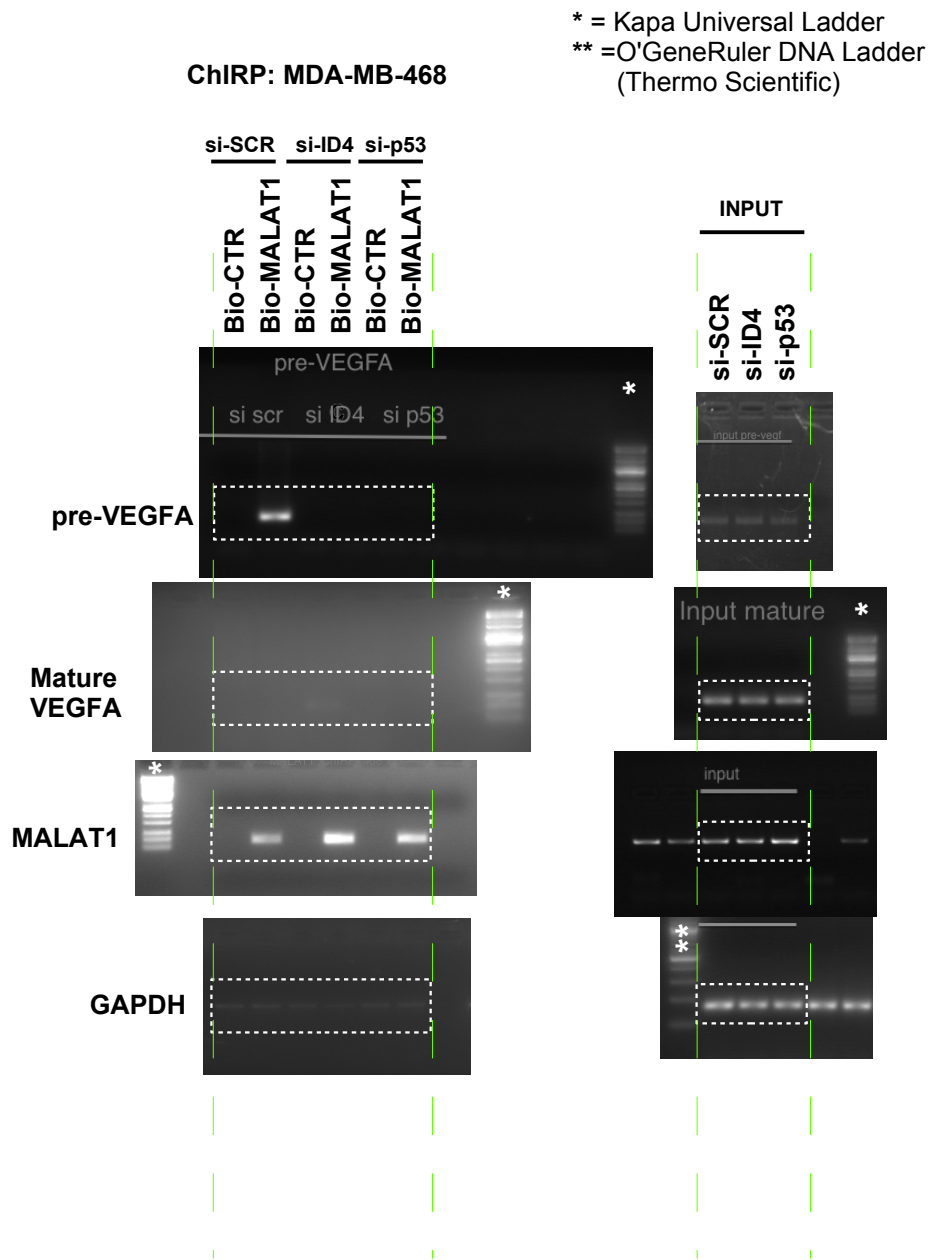

Supplement: EMBR-18-0-s008.pdf [file EMBR-18-0-s008.pdf]
